# Supplementary material
Source: PubMed Central journal article supplement (PMC6250601)

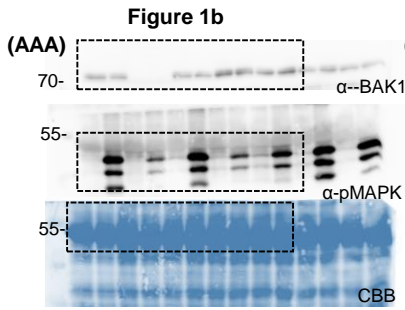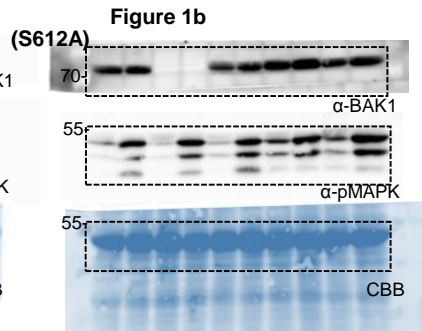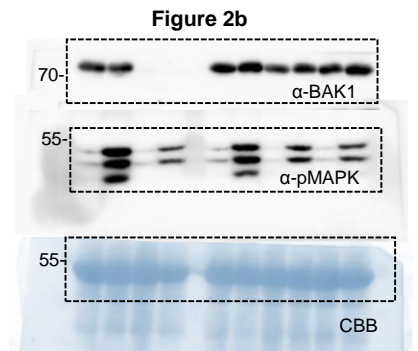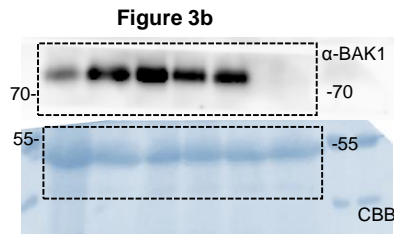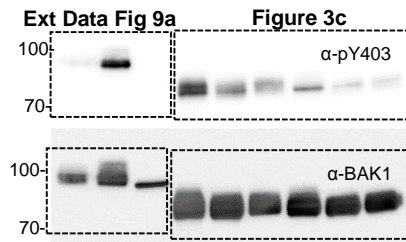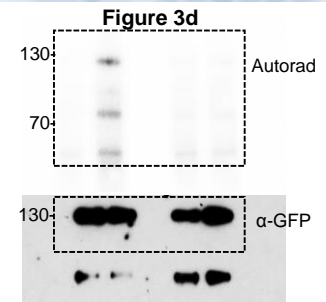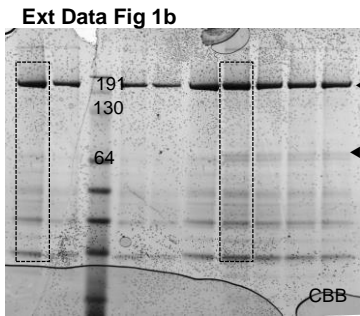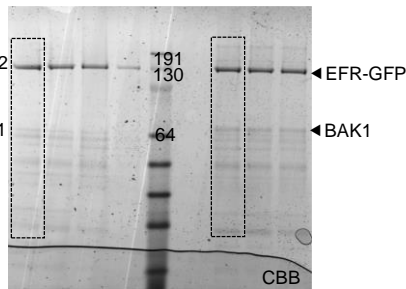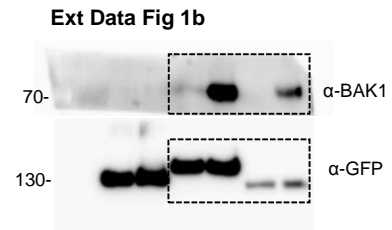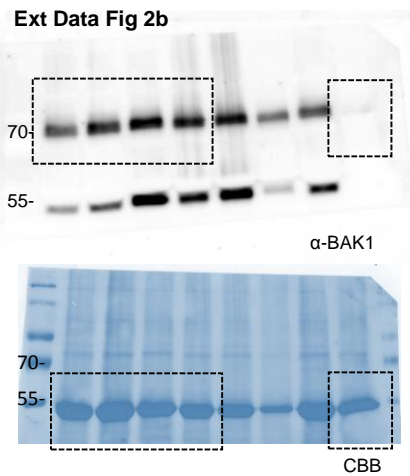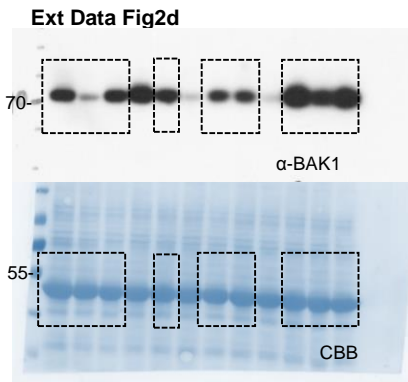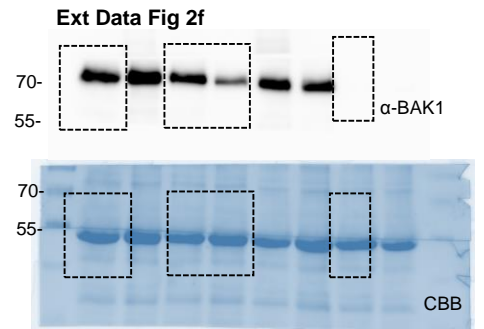

Ext Data Fig 3a

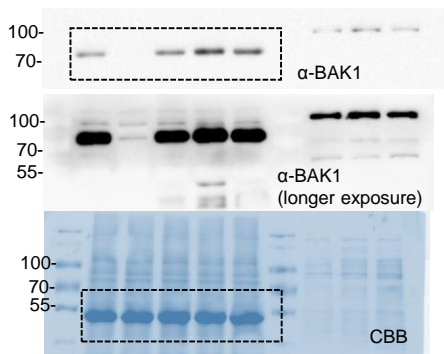

Ext Data Fig 3b

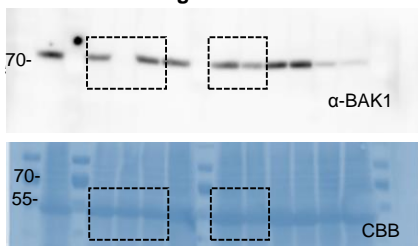

Ext Data Fig 3c

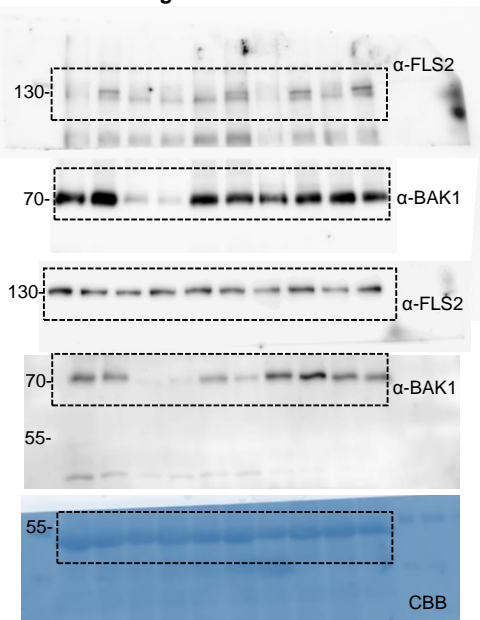

Ext Data Fig 3d

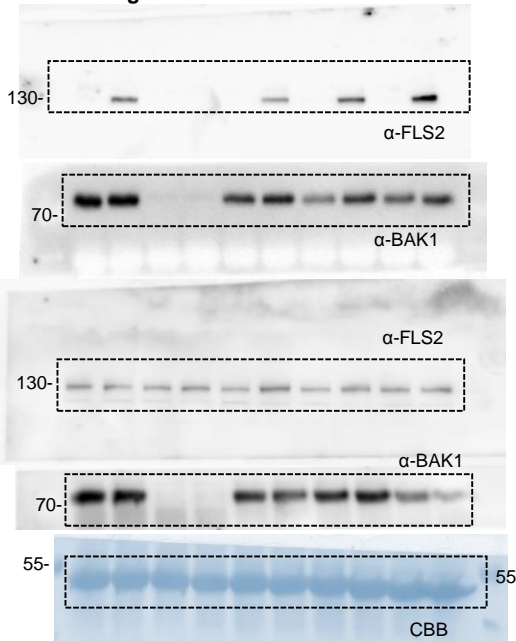

Ext Data Fig 4d

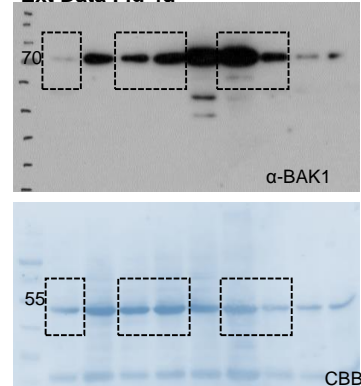

Ext Data Fig 4c

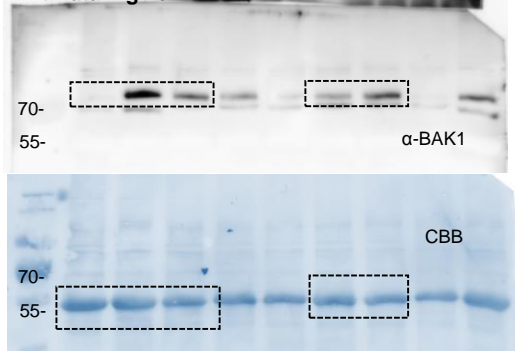

Ext Data Fig 4e

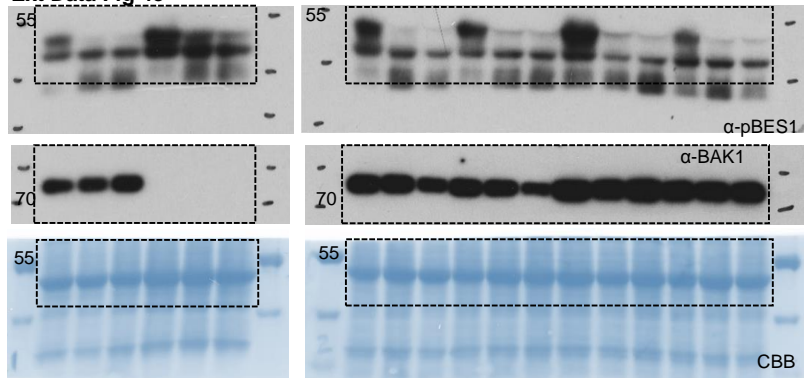

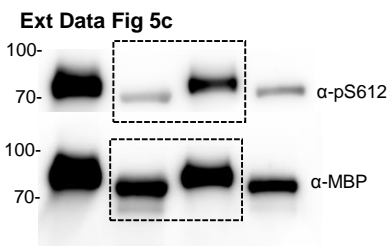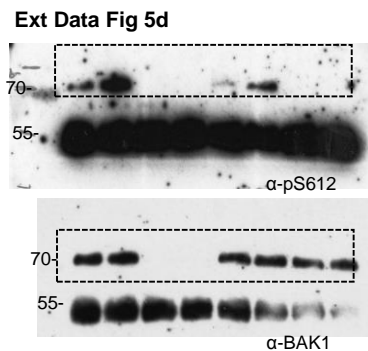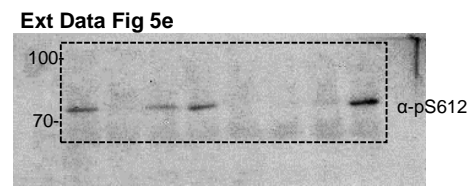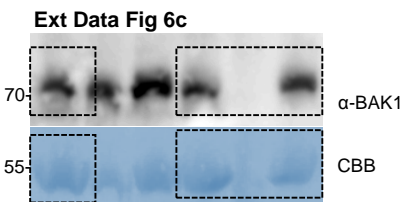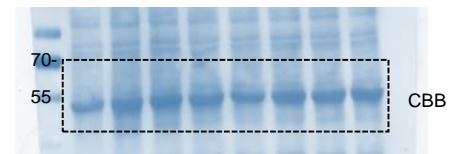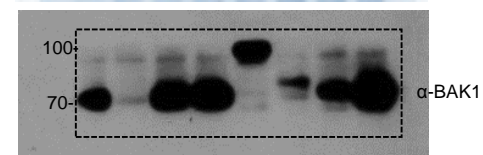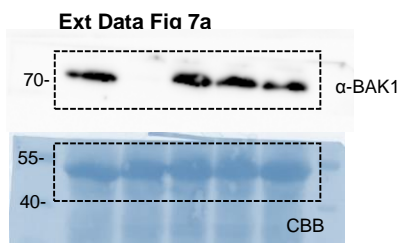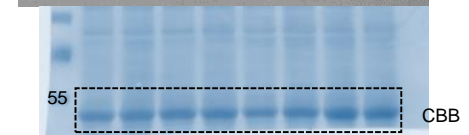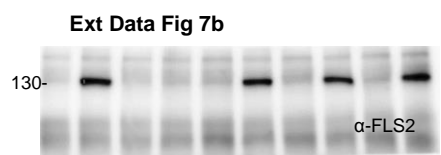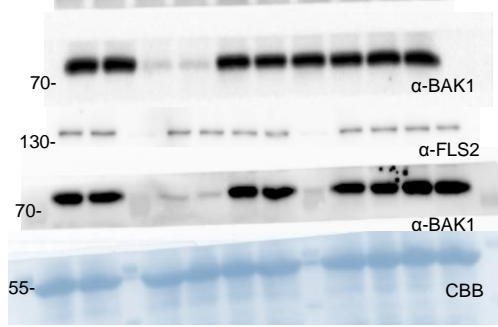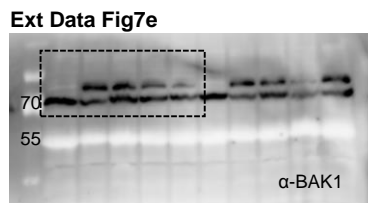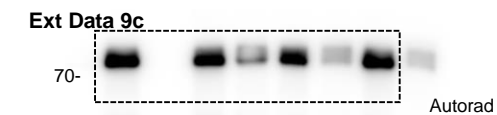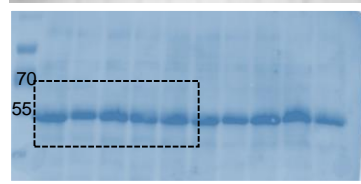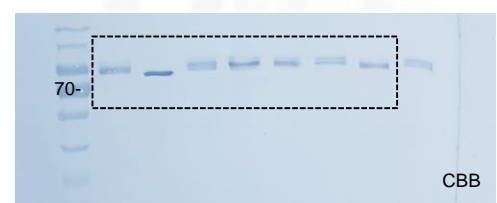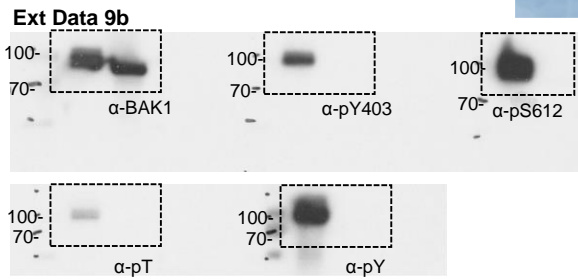

Ext Data Fig 9d

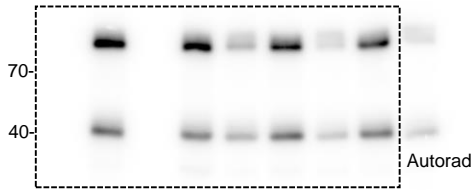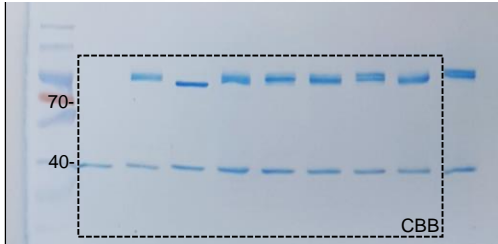

Ext Data Fig 9f

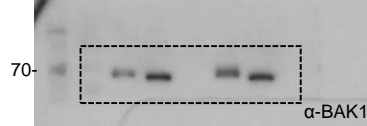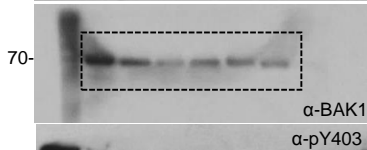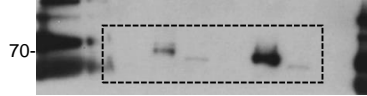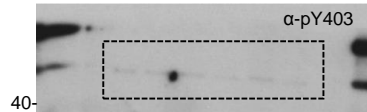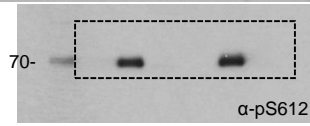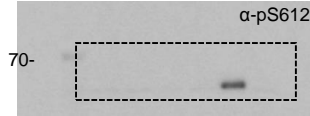

Ext Data Fig 9e

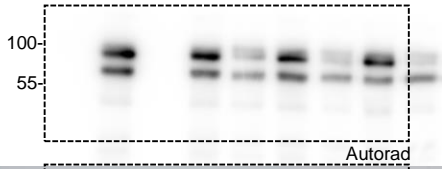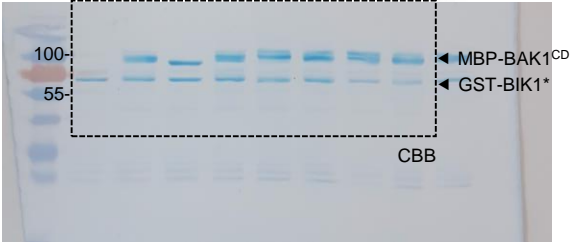

Supplement: NIHMS1500334-supplement-1.pdf [file NIHMS1500334-supplement-1.pdf]
