# Supplementary material
Source: PubMed Central journal article supplement (PMC6250601)
Supplement: NIHMS1500334-supplement-Sup_Table_2.pdf [file NIHMS1500334-supplement-Sup_Table_2.pdf]

| PRIMER NAME            | SEQUENCE                                             |
|------------------------|------------------------------------------------------|
| P25_BAK1_F             | TTGGTCTCAAATGGAACGAAGATTAATG                         |
| P26_BAK1_R             | TTGGTCTCTAAGCTTATCTTGGACCCGAGGG                      |
| P30_Y304F_R            | TTGGTCTCTTTAAAACTTTACCAAAACCAC                       |
| P32_Y363F_R            | TTGGTCTCTGGAAAAACAAGCAATCTTTCCGG                     |
| P34_Y365F_R            | TTGGTCTCTATGAAGGGATAAACAAGCAATC                      |
| P36_Y403F_R            | TTGGTCTCTAAAAACGCAAGCCCTCTTGCAG                      |
| P38_Y443F_R            | TTGGTCTCTTTGAAGTCCATGAGTTTTGCAA                      |
| P40_Y463F_R            | TTGGTCTCTAGGAACTCAGGGGCTATATGAC                      |
| P42_Y530F_R            | TTGGTCTCTAAGAAATTACCCTGAAGATCAA                      |
| P44_Y587F_R            | TTGGTCTCTGGGAAGTTGAAATCTTGTCTGA                      |
| P29_Y304F_F            | TTGGTCTCATTAAAGGACGGTTAGCTGATGG                      |
| P31_Y363F_F            | TTGGTCTCATTCCCTACATGGCTAATGGAAG                      |
| P33_Y365F_F            | TTGGTCTCATCATGGCTAATGGAAGTGTTC                       |
| P35_Y403F_F            | TTGGTCTCATTTTACATGATCATTGCGACCC                      |
| P37_Y443F_F            | TTGGTCTCATCAAAGACACACATGTGACAAC                      |
| P39_Y463F_F            | TTGGTCTCATCCTTTCCACTGGAAAATCATC                      |
| P41_Y530F_F            | TTGGTCTCATCTTAGACGAAGAAGTGGAGCA                      |
| P43_Y587F_F            | TTGGTCTCATCCCAACCCACCATCCAGCCGT                      |
| P63_S612D_R            | TTGGTCTCTAAGCTTATCTTGGACCATCGGG                      |
| P64_Y478F_F            | TTGGTCTCATTGGAGTCATGCTTCTTGTAGCT                     |
| P65_Y478F_R            | TTGGTCTCTCCAAACCCAAAGACATCGGTTT                      |
| P66_Y610F_R            | TTGGTCTCTAAGCTTATCTTGGACCCGAGGGGAATTCGTT             |
| P82_C408F_F            | TTGGTCTCATCGACCCAAAGATTATTCATCG                      |
| P83_C408F_R            | TTGGTCTCTTCGAAATGATCATGTAATAACG                      |
| P86_C408A_F            | TTGGTCTCAGCCGACCCAAAGATTATTCATCG                     |
| P95_C408A_R            | TTGGTCTCTCGGCATGATCATGTAATAACG                       |
| P90_C408S_F            | TTGGTCTCACCGACCCAAAGATTATTCATCG                      |
| P91_C408S_R            | TTGGTCTCTTCGGAATGATCATGTAATAACG                      |
| P58_S602A_R            | TTATCTTGGACCCGAGGGGTATTCTGTTTTCGATCTGGGAAGTGGCATC    |
| P60_T603A_R            | TTATCTTGGACCCGAGGGGTATTCTGTTTTCGATCTGGGAAGCGGAATC    |
| P61_S604A_R            | TTATCTTGGACCCGAGGGGTATTCTGTTTTCGATCTGGGCAGTGGGAATC   |
| P69_S602A/T603A_R      | TTATCTTGGACCCGAGGGGTATTCTGTTTTCGATCTGGGAAGCGGCATCGCC |
| P70_S602A/S604A_R      | TTATCTTGGACCCGAGGGGTATTCTGTTTTCGATCTGGGCAGTGGCATCGCC |
| P68_S602A/T602A/S603A  | TTATCTTGGACCCGAGGGGTATTCTGTTTTCGATCTGGGCAGCGGCATCGCC |
| P111_S602D/T602D/S603D | TTGGTCTCTAAGCTTATCTTGGACCATCGGG                      |
| P22_Y403D_F            | CTGCAAGAGGGCTTGCAGTTTACATGATCATTGCGAC                |
| P22_Y403D_R            | GTCGCAATGATCATGTAATCCGCAAGCCCTCTTGCAG                |
| P74_GREEN_BAK1_F       | GTTACTCCATGTACATGGTTTCATGTTACTTGCAATAGC              |
| P75_GREEN_BAK1_R       | TGACTCTAGAGGATCCTTATCTTGGACCCGAGGGGTATTC             |

---

|                   |                                                  |
|-------------------|--------------------------------------------------|
| P76_GREEN_R_S612A | TGACTCTAGAGGATCCTTATCTTGGACCCGCGGGGTATTC         |
| P108_POPINM_WT_F  | AAGTTCTGTTTCAGGGCCCGGACCACTTCTTTGATGTACCAGC      |
| P109_POPINM_WT_R  | ATGGTCTAGAAAAGCTTTATCTTGGACCCGAGGGGTA            |
| P110_POPINM_S612A | ATGGTCTAGAAAAGCTTTATCTTGGACCCGCGGGGTA            |
| P112_POPINM_S612D | ATGGTCTAGAAAAGCTTTATCTTGGACCATCGGGGTA            |
| P128_D416N_F      | CCCAAAGATTATTCATCGAAATGTGAAAGCTGCAAATATTTTGTG    |
| P129_D416N_R      | CAACAAAATATTTGCAGCTTTCACATTTTCGATGAATAATCTTTGGG  |
| BS127_C408F-F     | GGCTTGCGTATTTACATGATCATTTCGACCCAAAGATTATTCATCGAG |
| BS128_C408F-R     | CTCGATGAATAATCTTTGGGTCGAAATGATCATGTAATACGCAAGCC  |
| ERECTA_Y760F_F    | GCACAAGGTTTAGCTTTTCTACACCATGACTG                 |
| ERECTA_Y760F_RC   | CAGTCATGGTGTAGAAAAGCTAAACCTTGTGC                 |

---
