# Supplementary material
Source: PubMed Central journal article supplement (PMC6250601)

T446

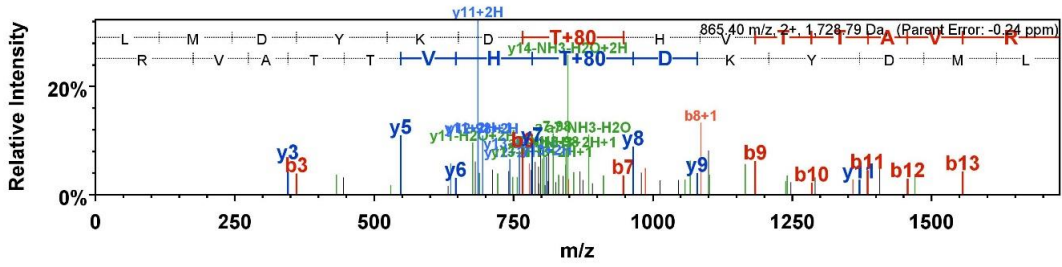

S602

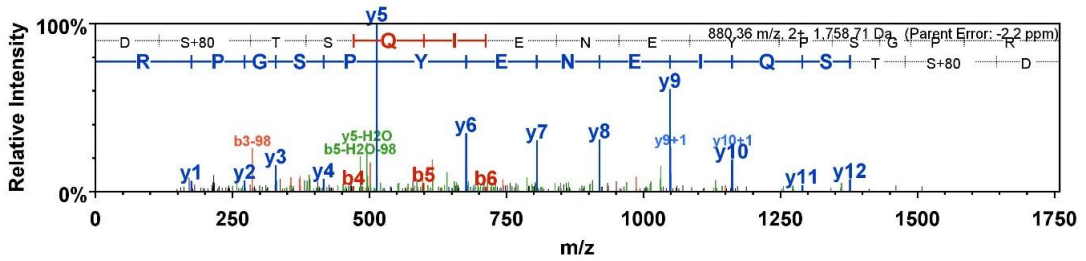

T603

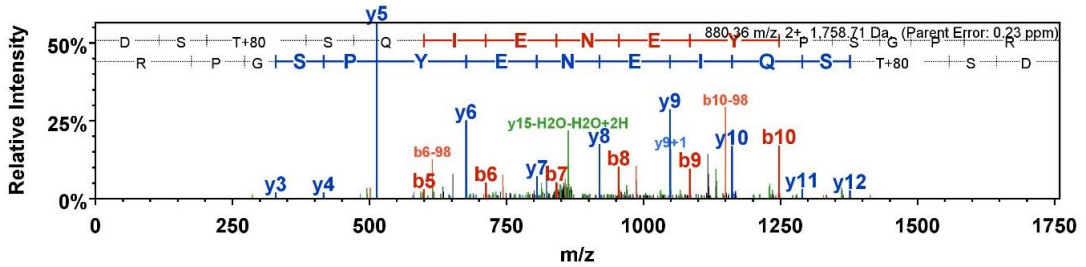

S604

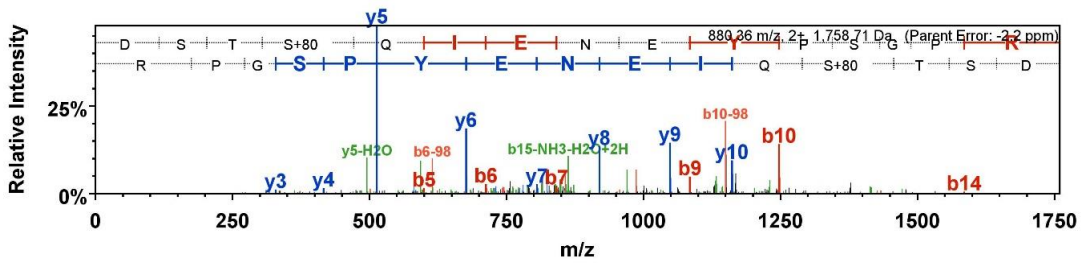

S612

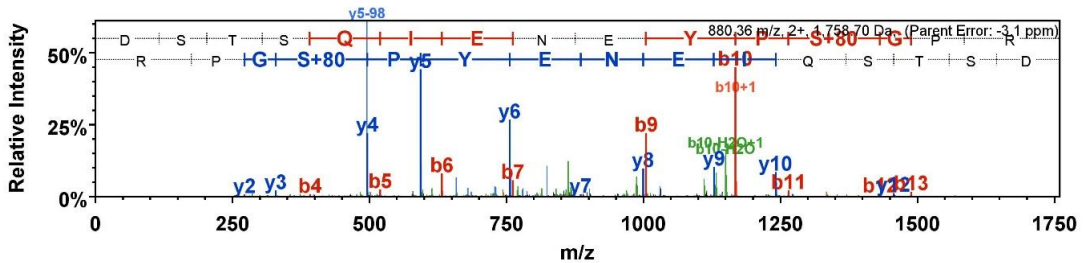

Supplement: NIHMS1500334-supplement-2.pdf [file NIHMS1500334-supplement-2.pdf]
